# Supplementary material for: Is Nature Relatedness Associated with Better Mental and Physical Health?
Source: MDPI journal article supplement (doi:10.3390/ijerph15071371), 2018-06-29
Supplement: s1 [file s1]

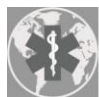

**Table S1.** Socio-Demographic Variables

| Variable                               | Description                                                                                                                                                                                                                                                                                                                                                                                                                                                                                                                                                |
|----------------------------------------|------------------------------------------------------------------------------------------------------------------------------------------------------------------------------------------------------------------------------------------------------------------------------------------------------------------------------------------------------------------------------------------------------------------------------------------------------------------------------------------------------------------------------------------------------------|
| Age                                    | Age range (12 response options from 18-20 years, then five year increments until 70+ years). For analysis this was split into two categories ( $<45$ , $\geq 45$ ), based on evidence that health changes significantly at this point (the risk of being diagnosed with hypertension begins to increase steeply at age 45 years (Australian Bureau of Statistics, 2013), and the prevalence of affective mood disorders such as depression begins to decline in Australia at about 45 (Slade, Johnston, Teesson, Whiteford, Burgess, Pirkis, & Saw, 2009). |
| Sex                                    | Male or female; for analysis purposes male = 1, female = 2.                                                                                                                                                                                                                                                                                                                                                                                                                                                                                                |
| Income quartile                        | Personal income selected from categories defined based on the income question provided in the Australian census (categories included weekly income of: nil or negative; \$1-\$199; \$200-\$299; \$300-\$399; \$400-\$599; \$600-\$799; \$800-\$999; \$1000-\$1249; \$1250-\$1499; \$1500-\$1999; \$2000+). For analysis purposes each respondent was grouped into the income quartile from the actual population that they fell within.                                                                                                                    |
| Presence of children <16 years in home | The presence or absence of people living in a respondent's home who were under 16 years at the time of the survey.                                                                                                                                                                                                                                                                                                                                                                                                                                         |
| Educational attainment                 | The highest formal educational qualification achieved by the respondent, grouped into five categories (1 = <i>school not completed</i> ; 2 = <i>school completed</i> ; 3 = <i>trade/diploma or equivalent</i> ; 4 = <i>university degree</i> ; 5 = <i>post-graduate degree</i> ).                                                                                                                                                                                                                                                                          |
| Primary language spoken at home        | An indication of the language primarily spoken at home. For analysis purposes 0 = <i>English</i> , 1 = <i>not English</i> .                                                                                                                                                                                                                                                                                                                                                                                                                                |
| Work status in survey week             | Respondents provided information on the number of hours worked in a normal week, and this was grouped into no-work (0 hours), part-time ( $<40$ hours), or full-time ( $>40$ hours).                                                                                                                                                                                                                                                                                                                                                                       |

**Table S2.** Results From Ordinal Regression Models (Cumulative Link) Assessing the Relationship Between Socio-Demographic Predictor Variables and Nature Relatedness Score and Nature Relatedness Self (Zero Order Correlations)

|                                         | NR Score  |         |         | NR Self   |         |         |
|-----------------------------------------|-----------|---------|---------|-----------|---------|---------|
|                                         | Estimate  | Std err | Z value | Estimate  | Std err | Z value |
| Age                                     | 0.767***  | 0.092   | 8.285   | 0.923***  | 0.093   | 9.881   |
| Gender (1 male, 2 female)               | 0.240**   | 0.089   | 2.706   | 0.393***  | 0.089   | 4.408   |
| Income Linear                           | -0.018    | 0.097   | -0.208  | -0.124    | 0.087   | -1.427  |
| Income quartile Quadratic               | -0.211*   | 0.089   | -2.366  | -0.232**  | 0.090   | -2.588  |
| Income quartile Cubic                   | -0.097    | 0.091   | -1.063  | -0.020    | 0.092   | -0.217  |
| Children <16 in home                    | -0.400*** | 0.099   | -4.053  | -0.282**  | 0.098   | -2.866  |
| Work hours Linear                       | -0.222*   | 0.087   | -2.551  | -0.343*** | 0.087   | -3.936  |
| Work hours Quadratic                    | 0.024     | 0.072   | 0.330   | -0.040    | 0.072   | -0.558  |
| Educational attainment Linear           | 0.134     | 0.125   | 1.072   | 0.141     | 0.124   | 1.135   |
| Educational attainment Quadratic        | -0.064    | 0.116   | -0.554  | 0.088     | 0.115   | 0.769   |
| Educational attainment Cubic            | -0.133    | 0.099   | -1.345  | -0.113    | 0.098   | -1.155  |
| Educational attainment Quartic          | 0.182*    | 0.089   | 2.047   | 0.234**   | 0.090   | 2.606   |
| Language<br>(0, English, 1 not English) | -0.560*** | 0.125   | -4.477  | -0.156    | 0.126   | -1.239  |
| Frequency of exercise ≥30mins           | 0.102***  | 0.021   | 4.828   | 0.076***  | 0.021   | 3.635   |
| BMI                                     | 0.227     | 0.210   | 1.081   | 0.227     | 0.210   | 1.081   |
| Social cohesion                         | 0.590***  | 0.086   | 6.861   | 0.605***  | 0.086   | 7.068   |

\*  $p < .05$ ; \*\*  $p < .01$ ; \*\*\*  $p < .001$ .

**Table S3.** Results From Ordinal Regression Models (Cumulative Link) Assessing the Relationship Between Socio-Demographic Predictor Variables and Nature Relatedness perspective and Nature Relatedness Experience (Zero Order Correlations)

|                                  | NR perspective |         |         | NR Experience |         |         |
|----------------------------------|----------------|---------|---------|---------------|---------|---------|
|                                  | Estimate       | Std err | Z value | Estimate      | Std err | Z value |
| Age                              | 0.421***       | 0.092   | 4.57    | 0.430***      | 0.091   | 4.714   |
| Gender (1 male, 2 female)        | 0.684***       | 0.090   | 7.608   | -0.512***     | 0.089   | -5.729  |
| Income (Linear                   | -0.112         | 0.088   | -1.277  | 0.203*        | 0.087   | 2.323   |
| Income quartile Quadratic        | -0.144         | 0.089   | -1.614  | -0.127        | 0.089   | -1.419  |
| Income quartile Cubic            | -0.107         | 0.091   | -1.178  | -0.113        | 0.092   | -1.233  |
| Children <16 in home             | -0.343***      | 0.100   | -3.424  | -0.368***     | 0.099   | -3.7    |
| Work hours Linear                | -0.125         | 0.087   | -1.435  | 0.037         | 0.087   | 0.426   |
| Work hours Quadratic             | 0.069          | 0.072   | 0.950   | 0.064         | 0.072   | 0.880   |
| Educational attainment Linear    | 0.012          | 0.127   | 0.093   | 0.194         | 0.128   | 1.517   |
| Educational attainment Quadratic | -0.060         | 0.117   | -0.512  | -0.216        | 0.117   | -1.848  |
| Educational attainment Cubic     | -0.139         | 0.100   | -1.404  | -0.151        | 0.100   | -1.516  |
| Educational attainment Quartic   | -0.017         | 0.089   | -0.194  | 0.177*        | 0.088   | 2.001   |
| Language                         |                | 0.127   | -2.819  |               | 0.127   | -6.644  |
| (0, English, 1 not English)      | -0.357**       |         |         | -0.847***     |         |         |
| Frequency of exercise ≥30mins    | 0.023          | 0.021   | 1.082   | 0.149***      | 0.027   | 7.062   |
| BMI                              | -0.026         | 0.212   | -0.125  | 0.308         | 0.214   | 1.441   |
| Social cohesion                  | 0.301***       | 0.086   | 3.513   | 0.536***      | 0.086   | 6.224   |

\*  $p < .05$ ; \*\*  $p < .01$ ; \*\*\*  $p < .001$ .

**Table S4.** Results From Ordinal Regression Models (Cumulative Link) Assessing the Relationship Between Socio-Demographic Predictor Variables and Symptoms of Depression

|                                         | Model 1<br>[NR Score] | Model 2<br>[NR Self] | Model 3<br>[NR Perspective] | Model 4<br>[NR Experience] |
|-----------------------------------------|-----------------------|----------------------|-----------------------------|----------------------------|
| Age                                     | -0.02(<0.01)***       | -0.02(<0.01)***      | -0.01(<0.01)***             | -0.01(<0.01)***            |
| Gender (1 male, 2 female)               | -0.15(0.09)           | -0.16(0.09)          | -0.16(0.09)                 | -0.17(0.09)                |
| Income quartile Linear                  | -0.25(0.1)*           | -0.24(0.1)*          | -0.25(0.1)*                 | -0.26(0.1)*                |
| Income quartile Quadratic               | -0.18(0.09)           | -0.17(0.09)          | -0.18(0.09)                 | -0.19(0.09)*               |
| Income quartile Cubic                   | -0.04(0.09)           | -0.04(0.09)          | -0.04(0.09)                 | -0.05(0.09)                |
| Children <16 in home                    | -0.11(0.05)*          | -0.1(0.05)*          | -0.11(0.05)*                | -0.11(0.05)*               |
| Work hours Linear                       | -0.28(0.1)**          | -0.28(0.1)**         | -0.28(0.1)**                | -0.28(0.1)**               |
| Work hours Quadratic                    | 0.11(0.07)            | 0.11(0.07)           | 0.11(0.07)                  | 0.11(0.07)                 |
| Educational attainment Linear           | 0.25(0.14)            | 0.23(0.14)           | 0.26(0.14)                  | 0.29(0.14)*                |
| Educational attainment Quadratic        | -0.07(0.12)           | -0.06(0.12)          | -0.07(0.12)                 | -0.08(0.12)                |
| Educational attainment Cubic            | 0.16(0.1)             | 0.17(0.1)            | 0.16(0.1)                   | 0.16(0.1)                  |
| Educational attainment Quartic          | -0.02(0.09)           | -0.02(0.09)          | -0.02(0.09)                 | -0.02(0.09)                |
| Language<br>(0, English, 1 not English) | -0.16(0.14)           | -0.17(0.14)          | -0.16(0.14)                 | -0.2(0.14)                 |
| Frequency of exercise ≥30mins           | -0.12(0.02)***        | -0.12(0.02)***       | -0.12(0.02)***              | -0.11(0.02)***             |
| BMI                                     | 1.13(0.24)***         | 1.13(0.24)***        | 1.13(0.24)***               | 1.14(0.24)***              |
| Social cohesion                         | -0.66(0.09)***        | -0.68(0.09)***       | -0.65(0.09)***              | -0.63(0.09)***             |
| NR Score                                | 0.07(0.08)            |                      |                             |                            |
| NR Self                                 |                       | 0.15(0.06)*          |                             |                            |
| NR Perspective                          |                       |                      | 0.05(0.06)                  |                            |
| NR Experience                           |                       |                      |                             | -0.07(0.06)                |

*Note.* Each model included a different NR measure [shown in square brackets]. The sum of the scores on the Depression subscale was used as the response variable. Coefficients are provided with the standard error in brackets, **and are unstandardized**. Work hours, income and educational attainment were ordered factor variables, so the polynomial contrasts were used to assess the pattern of the relationship.

\*  $p < .05$ ; \*\*  $p < .01$ ; \*\*\*  $p < .001$ .

**Table S5.** Results From Ordinal Regression Models (Cumulative Link) Assessing the Relationship Between Socio-Demographic Predictor Variables and Symptoms of Anxiety

|                                         | Model 1<br>[NR Score] | Model 2<br>[NR Self] | Model 3<br>[NR Perspective] | Model 4<br>[NR Experience] |
|-----------------------------------------|-----------------------|----------------------|-----------------------------|----------------------------|
| Age                                     | -0.02(<0.01)***       | -0.02(<0.01)***      | -0.02(<0.01)***             | -0.02(<0.01)***            |
| Gender (1 male, 2 female)               | -0.07(0.09)           | -0.08(0.09)          | -0.07(0.1)                  | -0.07(0.09)                |
| Income quartile Linear                  | -0.19(0.11)           | -0.18(0.11)          | -0.2(0.11)                  | -0.2(0.11)                 |
| Income quartile Quadratic               | -0.26(0.09)**         | -0.25(0.09)**        | -0.27(0.09)**               | -0.27(0.09)**              |
| Income quartile Cubic                   | -0.07(0.09)           | -0.06(0.09)          | -0.07(0.09)                 | -0.07(0.09)                |
| Children <16 in home                    | -0.09(0.05)           | -0.08(0.05)          | -0.09(0.05)                 | -0.09(0.05)                |
| Work hours Linear                       | -0.22(0.11)*          | -0.22(0.11)*         | -0.21(0.11)*                | -0.21(0.11)*               |
| Work hours Quadratic                    | 0.1(0.07)             | 0.11(0.07)           | 0.1(0.07)                   | 0.11(0.07)                 |
| Educational attainment Linear           | 0.11(0.14)            | 0.08(0.14)           | 0.13(0.14)                  | 0.15(0.14)                 |
| Educational attainment Quadratic        | 0.1(0.12)             | 0.1(0.12)            | 0.09(0.12)                  | 0.09(0.12)                 |
| Educational attainment Cubic            | 0.06(0.1)             | 0.06(0.1)            | 0.06(0.1)                   | 0.05(0.1)                  |
| Educational attainment Quartic          | 0(0.09)               | 0(0.09)              | 0.01(0.09)                  | 0.01(0.09)                 |
| Language<br>(0, English, 1 not English) | 0.32(0.14)*           | 0.3(0.14)*           | 0.31(0.14)*                 | 0.29(0.14)*                |
| Frequency of exercise >30mins           | -0.09(0.02)***        | -0.09(0.02)***       | -0.08(0.02)***              | -0.08(0.02)***             |
| BMI                                     | 1.01(0.24)***         | 1.03(0.24)***        | 1.01(0.24)***               | 1.01(0.24)***              |
| Social cohesion                         | -0.5(0.09)***         | -0.53(0.09)***       | -0.48(0.09)***              | -0.46(0.09)***             |
| NR Score                                | 0.13(0.08)            |                      |                             |                            |
| NR Self                                 |                       | 0.24(0.06)***        |                             |                            |
| NR Perspective                          |                       |                      | 0.05(0.06)                  |                            |
| NR Experience                           |                       |                      |                             | -0.04(0.06)                |

*Note.* Each model included a different NR measure [shown in square brackets]. The sum of the scores on the Anxiety subscale was used as the response variable. Coefficients are provided with the standard error in brackets, and are unstandardized. Work hours, income and educational attainment were ordered factor variables, so the polynomial contrasts were used to assess the pattern of the relationship.

\*  $p < .05$ ; \*\*  $p < .01$ ; \*\*\*  $p < .001$ .

**Table S6.** Results From Ordinal Regression Models (Cumulative Link) Assessing the Relationship Between Socio-Demographic Predictor Variables and Symptoms of Stress

|                                         | Model 1<br>[NR Score] | Model 2<br>[NR Self] | Model 3<br>[NR Perspective] | Model 4<br>[NR Experience] |
|-----------------------------------------|-----------------------|----------------------|-----------------------------|----------------------------|
| Age                                     | -0.02(<0.01)***       | -0.02(<0.01)***      | -0.02(<0.01)***             | -0.02(<0.01)***            |
| Gender (1 male, 2 female)               | 0.02(0.09)            | 0.01(0.09)           | 0(0.09)                     | 0.03(0.09)                 |
| Income quartile Linear                  | -0.17(0.1)            | -0.16(0.1)           | -0.18(0.1)                  | -0.18(0.1)                 |
| Income quartile Quadratic               | -0.13(0.09)           | -0.12(0.09)          | -0.12(0.09)                 | -0.14(0.09)                |
| Income quartile Cubic                   | 0.12(0.09)            | 0.12(0.09)           | 0.12(0.09)                  | 0.11(0.09)                 |
| Children <16 in home                    | 0.05(0.05)            | 0.05(0.05)           | 0.05(0.05)                  | 0.04(0.05)                 |
| Work hours Linear                       | 0(0.1)                | 0(0.1)               | 0(0.1)                      | 0(0.1)                     |
| Work hours Quadratic                    | 0.11(0.07)            | 0.12(0.07)           | 0.11(0.07)                  | 0.12(0.07)                 |
| Educational attainment Linear           | 0.25(0.14)            | 0.24(0.14)           | 0.26(0.14)                  | 0.29(0.14)*                |
| Educational attainment Quadratic        | -0.01(0.12)           | -0.01(0.12)          | -0.01(0.12)                 | -0.03(0.12)                |
| Educational attainment Cubic            | 0.13(0.1)             | 0.12(0.1)            | 0.12(0.1)                   | 0.12(0.1)                  |
| Educational attainment Quartic          | 0.04(0.09)            | 0.04(0.09)           | 0.05(0.09)                  | 0.04(0.09)                 |
| Language<br>(0, English, 1 not English) | -0.1(0.14)            | -0.12(0.14)          | -0.1(0.14)                  | -0.12(0.14)                |
| Frequency of exercise >30mins           | -0.04(0.02)*          | -0.04(0.02)*         | -0.04(0.02)                 | -0.03(0.02)                |
| BMI                                     | 0.75(0.24)**          | 0.76(0.24)**         | 0.76(0.24)**                | 0.76(0.24)**               |
| Social cohesion                         | -0.61(0.08)***        | -0.62(0.08)***       | -0.6(0.08)***               | -0.57(0.08)***             |
| NR Score                                | 0.17(0.08)*           |                      |                             |                            |
| NR Self                                 |                       | 0.19(0.06)**         |                             |                            |
| NR Perspective                          |                       |                      | 0.15(0.06)*                 |                            |
| NR Experience                           |                       |                      |                             | -0.02(0.06)                |

*Note.* Each model included a different NR measure [shown in square brackets]. The sum of the scores on the Stress subscale was used as the response variable. Coefficients are provided with the standard error in brackets, **and are unstandardized** Work hours, income and educational attainment were ordered factor variables, so the polynomial contrasts were used to assess the pattern of the relationship.

\*  $p < .05$ ; \*\*  $p < .01$ ; \*\*\*  $p < .001$ .

**Table S7.** Results From Ordinal Regression Models (Cumulative Link) Assessing the Relationship Between Socio-Demographic Predictor Variables and Respondent's Assessment of Their Own Health

|                                         | Coefficient (standard error) |                      |                                |                            |
|-----------------------------------------|------------------------------|----------------------|--------------------------------|----------------------------|
|                                         | Model 1<br>[NR Score]        | Model 2<br>[NR Self] | Model 3<br>[NR<br>Perspective] | Model 4<br>[NR Experience] |
| Age                                     | 0(<0.01)                     | 0(<0.01)             | 0.00(<0.01)                    | 0(<0.01)                   |
| Gender (1 male, 2 female)               | -0.24(0.1)*                  | -0.21(0.1)*          | -0.15(0.1)                     | -0.17(0.1)                 |
| Income quartile Linear                  | 0.3(0.11)**                  | 0.29(0.11)**         | 0.31(0.11)**                   | 0.29(0.11)**               |
| Income quartile Quadratic               | 0.13(0.1)                    | 0.12(0.1)            | 0.17(0.1)                      | 0.13(0.1)                  |
| Income quartile Cubic                   | -0.07(0.1)                   | -0.08(0.1)           | -0.08(0.1)                     | -0.07(0.1)                 |
| Children <16 in home                    | 0.01(0.05)                   | 0(0.05)              | 0.01(0.06)                     | 0.01(0.05)                 |
| Work hours Linear                       | 0.34(0.11)**                 | 0.34(0.11)**         | 0.33(0.11)**                   | 0.36(0.11)**               |
| Work hours Quadratic                    | 0.2(0.08)*                   | 0.2(0.08)*           | 0.23(0.08)**                   | -0.21(0.08)**              |
| Educational attainment Linear           | 0.13(0.15)                   | 0.16(0.15)           | 0.07(0.15)                     | 0.1(0.15)                  |
| Educational attainment Quadratic        | 0.01(0.13)                   | 0(0.13)              | -0.00(0.13)                    | 0.02(0.13)                 |
| Educational attainment Cubic            | 0(0.11)                      | 0(0.11)              | 0(0.11)                        | 0(0.11)                    |
| Educational attainment Quartic          | -0.05(0.1)                   | -0.05(0.1)           | -0.06(0.1)                     | -0.06(0.1)                 |
| Language<br>(0, English, 1 not English) | -0.18(0.14)                  | -0.21(0.14)          | -0.25(0.14)                    | -0.12(0.14)                |
| Frequency of exercise >30mins           | 0.26(0.02)***                | 0.27(0.02)***        | 0.26(0.02)***                  | 0.25(0.02)***              |
| BMI                                     | -2.62(0.26)***               | -2.64(0.26)***       | -2.74(0.26)***                 | -2.63(0.26)***             |
| Social cohesion                         | 0.49(0.09)***                | 0.53(0.09)***        | 0.37(0.08)***                  | 0.47(0.09)***              |
| NR Score                                | 0.13(0.08)                   |                      |                                |                            |
| NR Self                                 |                              | 0.08(0.07)           |                                |                            |
| NR Perspective                          |                              |                      | -0.08(0.07)                    |                            |
| NR Experience                           |                              |                      |                                | 0.24(0.07)***              |

*Note.* Each model included a different NR measure [shown in square brackets]. Work hours, income and educational attainment were ordered factor variables, so the polynomial contrasts were used to assess the pattern of the relationship.

\*  $p < .05$ ; \*\*  $p < .01$ ; \*\*\*  $p < .001$ .

**Table S8.** Results From Ordinal Regression Models (Cumulative Link) Assessing the Relationship Between Predictor Variables and Respondent's Assessment of Their Own Health. These Models Consider Each Predictor Separately Without Other Variables (i.e. Zero Order Correlations). The Three Predictors Shown Are Important Predictors of the Health Outcomes Measured Here.

|                               | Coefficient (standard error) |                      |                     |                                   |
|-------------------------------|------------------------------|----------------------|---------------------|-----------------------------------|
|                               | Model 1<br>[Depression]      | Model 2<br>[Anxiety] | Model 3<br>[Stress] | Model 4<br>[Self-reported health] |
| Frequency of exercise >30mins | -0.12(0.02)***               | -0.08(0.02)***       | -0.04(0.02)         | -0.28(0.02)***                    |
| BMI                           | 0.92(0.22)***                | 0.58(0.22)**         | 0.31(0.22)          | 2.74(0.24)***                     |
| Social cohesion               | -0.70(0.09)***               | -0.56(0.09)***       | -0.63(0.09)***      | -0.55(0.09)***                    |
